# Supplementary material for: PEG-8 Laurate Fermentation of Staphylococcus epidermidis Reduces the Required Dose of Clindamycin Against Cutibacterium acnes
Source: PubMed Central journal article supplement (PMC7404057; doi:10.3390/ijms21145103), 2020-07-19
Supplement: ijms-21-05103-s001.pdf [file ijms-21-05103-s001.pdf]

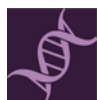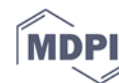

1 *Supplementary Materials*

2 **PEG-8 Laurate Fermentation of *Staphylococcus***  
3 ***epidermidis* Reduces the Required Dose of**  
4 **Clindamycin Against *Cutibacterium acnes***

5

6 **Shinta Marito<sup>1</sup>, Sunita Keshari<sup>2</sup>, and Chun-Ming Huang<sup>1\*</sup>**

7

8 <sup>1</sup>Department of Biomedical Sciences and Engineering, National Central University, Taoyuan 32001,  
9 Taiwan; shintasymbolon53@yahoo.com (S.M); chunming@ncu.edu.tw (C.-M.H)

10 <sup>2</sup>Department of Life Sciences, National Central University, Taoyuan, 32001, Taiwan;  
11 sunitakeshari827@gmail.com (S. K)

12

13 \*Correspondence: Professor Chun-Ming Huang, Department of Biomedical Sciences and  
14 Engineering, National Central University, Taoyuan; E-mail address: chunming@ncu.edu.tw; Tel:  
15 +886-3-422-7151 x 36101; Fax: +886-3-425-3427

16

17 Received: date; Accepted: date; Published: date

18

19

20

21

22

23

24

25

26

27

28

29

30

31

32

33

34

35

36

37

38

39

40

41 1. Supplementary Information

42  
43  
44  
45  
46  
47  
48  
49  
50  
51  
52  
53  
54  
55  
56  
57  
58  
59  
60  
61  
62  
63  
64  
65  
66  
67  
68  
69  
70  
71  
72  
73  
74  
75  
76  
77  
78  
79  
80  
81

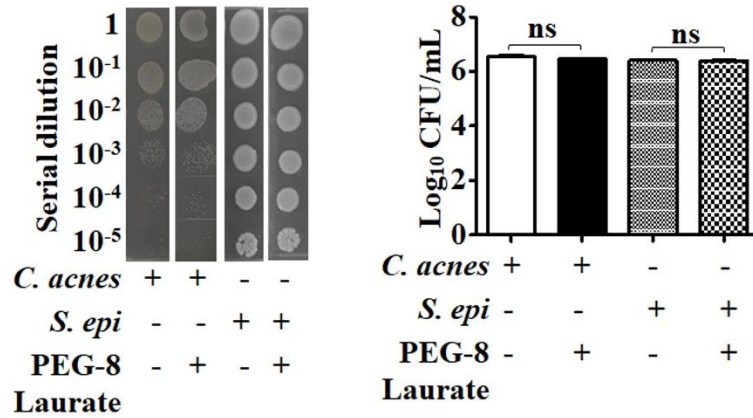

**Figure S1.** No effect of PEG-8 Laurate on the growth of *C. acnes* or *S. epidermidis*. *C. acnes* or *S. epidermidis* (*S. epi*) (10<sup>5</sup> CFU/mL) was incubated with and without 2% PEG-8 Laurate for 12 h. The CFUs (Log<sub>10</sub> CFU/mL) were calculated by plating serial dilutions (1:10<sup>0</sup>-1:10<sup>5</sup>) of *C. acnes* or *S. epidermidis* (*S. epi*) on RCM or TSB plates, respectively, 1 day. Data are represented as the mean ± SD of three separate experiments. ns = non-significant.

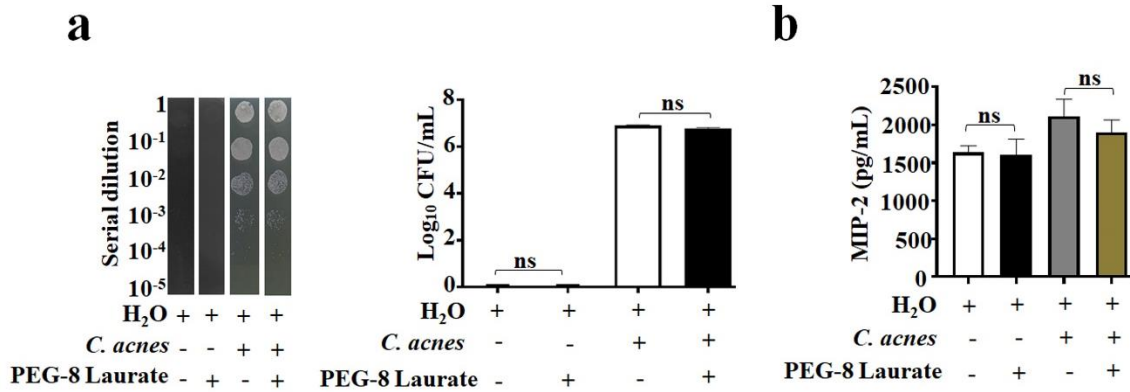

82  
 83 **Figure S2.** No influence of PEG-8 Laurate on the growth of *C. acnes* and *C. acnes*-induced MIP-2 production.  
 84 The ears of ICR mice were intradermally injected with *C. acnes* (10<sup>7</sup> CFU) with and without 2% PEG-8 Laurate  
 85 for 5 d. Mice ears injected with H<sub>2</sub>O was included as control. (a) the number (Log<sub>10</sub> CFU) of *C. acnes* in ear  
 86 homogenates, and (b) the levels of MIP-2 cytokines were quantified as described in Materials and Methods.  
 87 Data are represented as the mean ± SD of three separate experiments using three mice per group; ns = non-  
 88 significant.

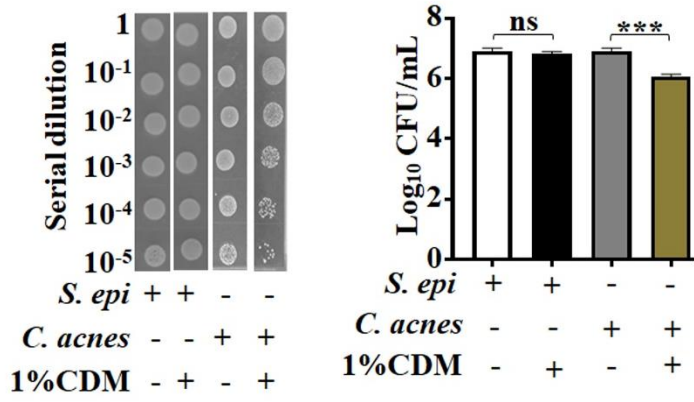

105 **Figure S3.** Inhibition of *C. acnes* growth by clindamycin. *S. epidermidis* (*S. epi*) or *C. acnes* (10<sup>7</sup> CFU) was  
 106 incubated with and without 1% clindamycin (CDM) for 24 h. After plating serial dilution (1:10<sup>0</sup>-1:10<sup>5</sup>) of  
 107 bacterial cultures on agar plates, the CFUs (Log<sub>10</sub> CFU/mL) of *S. epi* and *C. acnes* were quantified. Data are  
 108 represented as the mean ± SD, \*\*\* *p* < 0.001 (two-tailed t-tests); ns = non-significant.
